# Supplementary material
Source: HighWire-hosted journal article supplement (https://bmjopenquality.bmj.com/content/11/1/e001769)
Supplement: inline-supplementary-material-1 [file inline-supplementary-material-1.pdf]

**Supplementary Material**

**Thyroid Ultrasound – PRELIMINARY REPORT ONLY**

Patient Name: \_\_\_\_\_ MRN: \_\_\_\_\_ Exam Date: \_\_\_\_\_

ACC#: \_\_\_\_\_ RADIOLOGIST: \_\_\_\_\_ SONOGRAPHER: \_\_\_\_\_ Prev?: N/Y Date: \_\_\_\_\_

**HISTORY:**

**RISK FACTORS:** Personal history of thyroid malignancy: Y / N  
 Family history of thyroid malignancy: Y / N  
 Personal history of radiation: Y / N  
 Personal history of endocrine syndrome: Y / N

**OVERALL:** Homogenous / Heterogeneous Number of nodules: \_\_\_\_\_

**RIGHT LOBE:** Size (W x AP): \_\_\_\_\_ Previous size: \_\_\_\_\_

| # | LOC | SIZE (Sag x Ax x AP) | PREV SIZE | COMPOSITION | ECHOGENICITY | TALL> WIDE | MARGINS    | ECHOGENIC FOCI | Pts |
|---|-----|----------------------|-----------|-------------|--------------|------------|------------|----------------|-----|
| 1 |     |                      |           | c sp M S    | a ↑ = ↓ ↓↓   | n Y        | s id L I E | n ct M R P     |     |
| 2 |     |                      |           | c sp M S    | a ↑ = ↓ ↓↓   | n Y        | s id L I E | n ct M R P     |     |
| 3 |     |                      |           | c sp M S    | a ↑ = ↓ ↓↓   | n Y        | s id L I E | n ct M R P     |     |
| 4 |     |                      |           | c sp M S    | a ↑ = ↓ ↓↓   | n Y        | s id L I E | n ct M R P     |     |

Comments: \_\_\_\_\_

**LEFT LOBE:** Size (W x AP): \_\_\_\_\_ Previous size: \_\_\_\_\_

| # | LOC | SIZE (Sag x Ax x AP) | PREV SIZE | COMPOSITION | ECHOGENICITY | TALL> WIDE | MARGINS    | ECHOGENIC FOCI | Pts |
|---|-----|----------------------|-----------|-------------|--------------|------------|------------|----------------|-----|
| 1 |     |                      |           | c sp M S    | a ↑ = ↓ ↓↓   | n Y        | s id L I E | n ct M R P     |     |
| 2 |     |                      |           | c sp M S    | a ↑ = ↓ ↓↓   | n Y        | s id L I E | n ct M R P     |     |
| 3 |     |                      |           | c sp M S    | a ↑ = ↓ ↓↓   | n Y        | s id L I E | n ct M R P     |     |
| 4 |     |                      |           | c sp M S    | a ↑ = ↓ ↓↓   | n Y        | s id L I E | n ct M R P     |     |

Comments: \_\_\_\_\_

**ISTHMUS:** Size (AP): \_\_\_\_\_ Previous size: \_\_\_\_\_

| # | LOC | SIZE (Sag x Ax x AP) | PREV SIZE | COMPOSITION | ECHOGENICITY | TALL> WIDE | MARGINS    | ECHOGENIC FOCI | Pts |
|---|-----|----------------------|-----------|-------------|--------------|------------|------------|----------------|-----|
| 1 |     |                      |           | c sp M S    | a ↑ = ↓ ↓↓   | n Y        | s id L I E | n ct M R P     |     |

Comments: \_\_\_\_\_

**LYMPH NODES:** Normal / Abnormal

**OTHER COMMENTS:**

TIRADS Guidelines (2017):

| Report 4 most suspicious nodules with highest TIRADS score | COMPOSITION | ECHOGENICITY       | TALLER THAN WIDE | MARGINS               | ECHOGENIC FOCI | POINTS/TIRADS LEVEL                            |
|------------------------------------------------------------|-------------|--------------------|------------------|-----------------------|----------------|------------------------------------------------|
| c Cystic                                                   | 0           | a Anechoic         | 0                | s Smooth              | 0              | 0 Pts TR1 Benign                               |
| sp Spongiform                                              | 0           | ↑ Hyperechoic      | 1                | id Ill-defined        | 0              | 2 Pts TR2 Not suspicious                       |
| M Mixed cystic & nodule                                    | 1           | = Isoechoic        | 1                | L Lobulated           | 2              | M Macrocalc 1 suspicious                       |
| S Solid                                                    | 2           | ↓ Hypoechoic       | 2                | I Irregular           | 2              | R Rim calc 2 3 Pts TR3 Mildly suspicious       |
|                                                            |             | ↓↓ Very Hypoechoic | 3                | E Extra-Thyroidal ext | 3              | P Punctate 3 4-6 Pts TR4 Moderately suspicious |
|                                                            |             |                    |                  |                       |                | 7+ Pts TR5 Highly suspicious                   |

Figure 1: The redesigned sonographer worksheet

## FINDINGS:

## THYROID:

Texture: Homogeneous

Estimated total number of nodules:

Rt:  $\geq$  1cm: 1

Lt:  $\geq$  1cm: 1

Isthmus: 0

Number of spongiform nodules  $\geq$  2cm not described below (TR1): 0

Number of mixed cystic and solid nodules  $\geq$  1.5cm not described below (TR2):0

## MARKER NODULES:

Nodule#: 1

Location: Right midpole

Maximum size (S x TR x AP): 0.4 x 0.5 x 0.4 cm cm;

Composition: Solid

Echogenicity: hypoechoic (2)

Shape: Wider than tall

Margins: ill-defined (0)

Echogenic foci: No, , ,

ACR TI-RADS total points: 4

ACR TI-RADS risk category: Moderate

Prior biopsy: N

Nodule#: 2

Location: Right midpole

Maximum size (S x TR x AP): 1.2 x 0.9 x 0.7 cm;

Composition: mixed cystic and solid (1)

Echogenicity: isoechoic (1)

Shape: Wider than tall

Margins: Extrathyroidal extension (3)

Echogenic foci: no

ACR TI-RADS total points: 5

ACR TI-RADS risk category: Moderate

Prior biopsy: No

Nodule#: 3

Location: Left upper pole

Maximum size (S x TR x AP): 2.8 x 1.4 x 1.3 cm;

Composition: Solid

Echogenicity: hyperechoic (1)

Shape: Wider than tall

Margins: ill-defined (0)

Echogenic foci: No

ACR TI-RADS total points: 3

ACR TI-RADS risk category: Mildly suspicious

Prior biopsy: No

Nodule#: 4

Location: Left midpole

Maximum size (S x TR x AP): 0.7 x 0.5 x 0.5 cm;

Composition: Solid

Echogenicity: hypoechoic (2)

Shape: Wider than tall

Margins: ill-defined (0)

Echogenic foci: no

ACR TI-RADS total points: 4

ACR TI-RADS risk category: Moderate

Prior biopsy: No

LYMPH NODES: No

OPINION:

4 thyroid nodules as described above. Ultrasound-guided FNA suggested for the left TIRADS 3 nodule. Follow-up suggested for the other nodules.

ACR TI-RADS recommendations:

TR5 (>= 7 points) -FNA if >= 1cm, follow-up if 0.5 -0.9 cm every year for 5 years

TR4 (4-6 points) -FNA if >= 1.5cm, follow-up if 1 -1.4 cm in 1, 2, 3 and 5 years

TR3 (3 points)-FNA if >= 2.5cm, follow-up if 1.5 -2.4 cm in 1, 3 and 5 years

TR2 (2 points) \T\ TR1 (0 points) -No FNA or follow-up

Figure 2: A sample thyroid ultrasound report using the new structured dictation template
